# Supplementary material
Source: publisher figshare collection journal article supplement (https://acs.figshare.com/ndownloader/files/4737733)
Supplement: Supplementary file 1 [file 4737733]

## **Supporting Information**

### **Sunlight-mediated inactivation of MS2 coliphage via exogenous singlet oxygen produced by sensitizers in natural waters**

Tamar Kohn and Kara L. Nelson

Department of Civil and Environmental Engineering

University of California, Berkeley

Berkeley, CA 94720

Pages: 5

Contents: Chemicals and Reagents

MS2 Propagation and Enumeration

Derivation of  $\kappa_{\text{obs}}^{\text{abs}}$

## Chemicals and Reagents

Experiments were conducted in deionized (DI) water, D<sub>2</sub>O (99.8%, Acros), or samples obtained from a WSP (fourth in series) at the Socol Water Recycling Facility, Napa, CA, a facility treating municipal waste water. Solutions were buffered with either phosphate (NaH<sub>2</sub>PO<sub>4</sub>, Fisher) or bicarbonate (NaHCO<sub>3</sub>, Fisher). Ionic strength was adjusted with NaCl (Fisher). Fluka humic acid (FHA; Fluka), Suwannee river humic acid (SRHA; International Humic Substance Society) and Rose Bengal sodium salt (Sigma) were used as sensitizers. Quenchers included sodium formate (99%, Fisher), L-histidine (98%, Acros), catalase (Sigma), and superoxide dismutase from bovine erythrocytes (SOD; Sigma). Desferioxamine mesylate (EMD Biosciences) was used to inhibit the Fenton reaction. Furfuryl alcohol (FFA; 99%, Aldrich) and phenol (99%, Fisher) were used to quantify <sup>1</sup>O<sub>2</sub> and OH<sup>•</sup>, respectively. Reagents for the analysis of H<sub>2</sub>O<sub>2</sub> (30%, Fisher) were ethylenediaminetetraacetic acid disodium salt (Acros), 2,2-dipyridyl (99%, Aldrich), horseradish peroxidase (Sigma) N,N-diethyl-1,4-phenylenediamine sulfate (97%, Aldrich), perchloric acid (Fisher) and sulfuric acid (Fisher). Liquid chromatography eluents were acetonitrile (Fisher) and formic acid (88%, Fisher). Sample aliquots were diluted with dilution water (DW; Hach). Reagents for nutrient broth and agar plates contained Bacto tryptone (BD), yeast extract (EM Science), NaCl (Fisher), streptomycin sulfate (Fisher), ampicillin sodium salt (Fisher), CaCl<sub>2</sub> (EMD) and dextrose (EMD); granulated agar (Fisher) was also added the nutrient agar. Air and N<sub>2</sub> were purchased from Praxair Inc. (Danbury, CT).

## **MS2 Propagation and Enumeration.**

MS2 (ATCC 15597-B1) was propagated as described in ref. 1, using *E.coli* (ATCC 700891) as the host organism. The concentration of the MS2 stock solution was  $2 \times 10^{11}$  Plaque Forming Units (PFU)/mL. Enumeration was performed using the double-layer agar method (1). Triplicate analysis of selected samples yielded reproducible results (95% confidence intervals of 0.08 log units).

## Derivation of $\kappa_{\text{obs}}^{\text{abs}}$

The procedure for calculating the average number of photons absorbed throughout the sample per unit time,  $\dot{n}_{\text{abs average}}$  (photons/(m<sup>2</sup>s)), was based on the approach of Morowitz (2) and was as modified as follows. The irradiance at any wavelength at any depth in the water sample can be calculated according to the Beer-Lambert Law (3):

$$\frac{\Delta I(\lambda, z)}{\Delta \lambda} = \frac{\Delta I_0(\lambda)}{\Delta \lambda} \cdot 10^{-\alpha(\lambda)z}, \quad (\text{eq. S1})$$

where  $I(\lambda, z)$  is the irradiance at wavelength  $\lambda$  (W/m<sup>2</sup>) at depth  $z$  (cm),  $I_0(\lambda)$  is the irradiance by wavelength  $\lambda$  at the sample surface (W/m<sup>2</sup>), and  $\alpha(\lambda)$  is the absorption coefficient at wavelength  $\lambda$  of the water sample (cm<sup>-1</sup>). The typical Beer-Lambert Law has been modified in eq. S1 such that the irradiance is represented as a differential,  $\frac{\Delta I(\lambda, z)}{\Delta \lambda}$ , to account for the discrete measurements recorded over intervals of  $\Delta \lambda$  (= 1 nm, in the case of our spectroradiometers).

The light absorbed at any wavelength by the water column above depth  $z$ ,  $I_{\text{abs}}(\lambda, z)$ , is equal to the difference between  $I_0(\lambda)$  and  $I(\lambda, z)$ . To calculate the average light absorbed throughout the sample,  $I_{\text{abs}}(\lambda, z)$  was integrated over the reactor depth ( $L = 5$  to 6.5 cm), and then divided by the reactor depth:

$$I_{\text{abs, average}}(\lambda) = \int_0^L \frac{1}{L} \left( \frac{\Delta I_0(\lambda)}{\Delta \lambda} - \frac{\Delta I(\lambda, z)}{\Delta \lambda} \right) dz = \frac{\Delta I_0(\lambda)}{\Delta \lambda} \left( 1 - \frac{1}{L \cdot \alpha(\lambda) \cdot \ln(10)} (1 - 10^{-\alpha(\lambda)L}) \right) \quad (\text{eq. S2})$$

$I_{\text{abs, average}}(\lambda)$  can then be converted to the average number of photons absorbed at each wavelength per unit time,  $\dot{n}_{\text{abs average}}(\lambda)$ , using the relationship

$$I_{\text{abs, average}}(\lambda) = \dot{n}_{\text{abs, average}}(\lambda) \cdot \frac{hc}{\lambda} \quad (\text{eq. S3})$$

where  $h$  is Planck's constant ( $6.626 \times 10^{-34}$  Js), and  $c$  is the speed of light ( $2.998 \times 10^8$  ms<sup>-1</sup>).

$\dot{n}_{\text{abs average}}$  for all  $\lambda$  can be determined by summing over all wavelengths considered (320 – 700 nm):

$$\dot{n}_{\text{abs, average}} = \sum_{\lambda=320\text{nm}}^{700\text{nm}} (\dot{n}_{\text{abs, average}}(\lambda)) \Delta\lambda \quad (\text{eq. S4})$$

The number of photons absorbed at any point during the experiment,  $n_{\text{abs, average}}$ , is calculated by multiplying  $\dot{n}_{\text{abs average}}$  by the exposure time of the sample to simulated sunlight.  $\kappa_{\text{obs}}^{\text{abs}}$  can thus be calculated from the slope of a plot of  $\ln(\text{PFU/mL})$  vs. average number of photons absorbed.

## Literature cited

- (1) APHA; AWWA; WEF *Standard Methods for the Examination of Water & Wastewater*; 21 ed.; American Public Health Association, American Water Works Association, and Water Environment Federation: Washington, DC, 2005.
- (2) Morowitz, H. J. Absorption effects in volume irradiation of microorganisms. *Science* **1950**, *111*, 229-230.
- (3) Stumm, W.; Morgan, J. M. *Aquatic Chemistry: Chemical Equilibria and Rates in Natural Waters*; 3rd ed.; John Wiley & Sons, Inc.: New York, 1996.
